# Supplementary material
Source: publisher figshare collection journal article supplement (https://acs.figshare.com/ndownloader/files/5490764)
Supplement: Supplementary file 1 [file 5490764]

# Supporting Information

## Synthesis and Properties of [7]Helicene-like Compounds Fused with a Fluorene Unit

Hiromi Oyama,<sup>†</sup> Midori Akiyama,<sup>†</sup> Koji Nakano,<sup>‡</sup> Masanobu Naito,<sup>§</sup>  
Kazuyuki Nobusawa,<sup>||</sup> and Kyoko Nozaki<sup>\*,†</sup>

<sup>†</sup>*Department of Chemistry and Biotechnology, Graduate School of Engineering, The  
University of Tokyo, 7-3-1 Hongo, Bunkyo-ku, Tokyo 113-8656, Japan*

<sup>‡</sup>*Department of Organic and Polymer Materials Chemistry, Tokyo University of  
Agriculture and Technology, 2-24-16 Naka-cho, Koganei, Tokyo 184-8588, Japan*

<sup>§</sup>*Research center for structural materials, National Institute for Materials Science, 1-2-1  
Sengen, Tsukuba, Ibaraki 305-0047, Japan*

<sup>||</sup>*Graduate School of Engineering, Osaka University, 8-1 Mihogaoka, Ibaraki, Osaka  
567-0047, Japan*

e-mail: nozaki@chembio.t.u-tokyo.ac.jp

### Table of Contents

|                                                                                                                     |         |
|---------------------------------------------------------------------------------------------------------------------|---------|
| General Procedures                                                                                                  | S2      |
| Synthetic procedures and Characterization Data                                                                      | S3–S6   |
| <sup>1</sup> H and <sup>13</sup> C spectra of compounds <b>3a</b> , <b>3b</b> , <b>3c</b> , <b>5</b> , and <b>6</b> | S7–S11  |
| X-ray Analysis                                                                                                      | S12–S17 |
| DFT and TD-DFT calculation results                                                                                  | S18–S21 |
| References                                                                                                          | S22     |

**General Procedures.** All manipulations involving air- and/or moisture-sensitive compounds were carried out with the standard Schlenk technique under argon. Most of reagents were used without further purification unless otherwise specified. Analytical thin-layer chromatography was performed on a glass plates coated with 0.25-mm 230–400 mesh silica gel containing a fluorescent indicator. Column chromatography was performed by using silica gel (spherical neutral, particle size 63-210  $\mu\text{m}$ ). NMR spectra were recorded in  $\text{CDCl}_3$  on a 500 MHz spectrometer ( $^1\text{H}$  500 MHz;  $^{13}\text{C}$  126 MHz) or a 400 MHz spectrometer ( $^1\text{H}$  400 MHz;  $^{13}\text{C}$  101 MHz). Chemical shifts are reported in ppm relative to the internal standard signal (0 ppm for  $\text{Me}_4\text{Si}$  in  $\text{CDCl}_3$ ) or the residual solvent signal (7.26 ppm for  $\text{CHCl}_3$  in  $\text{CDCl}_3$ ) for  $^1\text{H}$  and the deuterated solvent signal (77.16 ppm for  $\text{CDCl}_3$ ) for  $^{13}\text{C}$ . Data are presented as follows: chemical shift, multiplicity (s = singlet, d = doublet, t = triplet, m = multiplet and/or multiple resonances), coupling constant in hertz (Hz), and signal area integration in natural numbers. Melting points were determined on a melting point apparatus. High resolution mass spectra are taken by electrospray ionization-time-of-flight (ESI-TOF) method. UV-Vis absorption spectra were recorded on a UV-VIS scanning spectrophotometer. Photoluminescence spectra were recorded on a spectrofluorometer. Absolute quantum yields were determined by absolute quantum yield measurement system with an integrating sphere. Circular dichroism (CD) spectra were recorded on a CD spectrometer system. CPL spectra were measured by using a CPL spectrophotometer. Optical rotations were measured on a polarimeter using a 1-dm cell. HPLC analyses were carried out using a DAICEL CHIRAPAK<sup>®</sup> IF-3 column (4.6 mm  $\times$  250 mm).

**Computational Studies.** The DFT and TD-DFT calculations were performed by using the Gaussian 09 program<sup>1</sup> at the B3LYP/6–31G(d) level.

## Synthetic Procedures and Characterization Data

**4,5-Dibromo-9-fluorenone (6):** A dry flask was charged with 2,2',6,6'-tetrabromobiphenyl (2.0 g, 4.3 mmol) and anhydrous THF (260 mL). To the mixture was added  $n$ BuLi (2.68 M in hexane, 3.2 mL, 8.5 mmol) at  $-78\text{ }^{\circ}\text{C}$ . After stirring for 2 h, chloromethyl formate (0.96 mL, 12.8 mmol) was added. The reaction mixture was stirred for 30 min, and the reaction was quenched by the addition of saturated aqueous  $\text{NH}_4\text{Cl}$  (3 mL). After stirring for 30 min, water (20 mL) was added. The resulting mixture was extracted with  $\text{Et}_2\text{O}$ , and the combined organic layer was dried over  $\text{Na}_2\text{SO}_4$ , filtered, and concentrated under reduced pressure. The crude residue was purified by silica-gel column chromatography ( $\text{CH}_2\text{Cl}_2/\text{hexane} = 1/2$  as an eluent) to afford the title compound as a yellow solid (0.75 g, 78% yield):  $^1\text{H}$  NMR (400 MHz,  $\text{CDCl}_3$ )  $\delta = 7.76\text{--}7.70$  (m, 4H),  $7.26\text{--}7.21$  (m, 2H);  $^{13}\text{C}$  NMR (101 MHz,  $\text{CDCl}_3$ )  $\delta = 190.5, 144.1, 142.0, 138.1, 130.7, 123.5, 117.1$ ; HRMS-ESI $^+$  ( $m/z$ ) calcd for  $\text{C}_{14}\text{H}_{10}\text{Br}_2\text{O}_2\text{Na}^+$  ( $[\text{M} + \text{Na} + \text{MeOH}]^+$ ) 390.8940, found 390.8943.

**1,9-Bis{2-[(trimethylsilyl)ethynyl]phenyl}fluorenone:** 1-Bromo-2-[(trimethylsilyl)ethynyl]-benzene (6.32 g, 25.0 mmol) in THF (100 mL) was cooled to  $-78\text{ }^{\circ}\text{C}$ , and  $t$ -BuLi (1.60 M in pentane, 30.7 mL, 52.1 mmol) was added dropwise. After stirring for 40 minutes, the resulting solution was transferred to a mixture of  $\text{ZnCl}_2$  (3.64 g, 26.4 mmol) and THF (100 mL) at  $0\text{ }^{\circ}\text{C}$ . The resulting mixture was stirred for 30 minutes, and **6** (3.34 g, 9.88 mmol) in THF (70 mL) and  $\text{Pd}(\text{PPh}_3)_4$  (2.28 g, 1.90 mmol) was added to the solution. The resulting mixture was warmed to room temperature, and then refluxed for 22 h. The reaction was then quenched with saturated aqueous  $\text{NH}_4\text{Cl}$  (10 mL), and the resulting mixture was concentrated under reduced pressure. The resulting residue was extracted with  $\text{CH}_2\text{Cl}_2$ , washed with brine, dried over  $\text{MgSO}_4$ , filtered, and concentrated under reduced pressure. The crude residue was purified by silica-gel column chromatography with  $\text{CH}_2\text{Cl}_2/\text{hexane}$  (1/4) as an eluent to give a mixture of *cis*- and *trans*-isomers of the title compound as a yellow solid (4.5 g). The obtained

mixture of isomers was further used without separation. HRMS-ESI<sup>+</sup> (*m/z*) calcd for C<sub>35</sub>H<sub>32</sub>OSi<sub>2</sub>Na<sup>+</sup> ([M + Na]<sup>+</sup>) 547.1884, found 547.1865.

**1,9-Bis(2-ethynylphenyl)fluorenone (7):** A mixture of 1,9-bis{2-[(trimethylsilyl)ethynyl]phenyl}-fluorenone (4.5 g, 8.6 mmol), K<sub>2</sub>CO<sub>3</sub> (2.6 g, 19 mmol), CH<sub>2</sub>Cl<sub>2</sub> (20 mL), MeOH (200 mL) was vigorously stirred until completion of the reaction, which was monitored by TLC. After water (10 mL) was added, the resulting mixture was extracted with CH<sub>2</sub>Cl<sub>2</sub>. The organic layer was washed with brine, dried over MgSO<sub>4</sub>, filtered, and concentrated under reduced pressure. The crude residue was purified by recrystallization from CH<sub>2</sub>Cl<sub>2</sub>/hexane to give a mixture of *cis*- and *trans*-isomers of **7** (2.96 g) as a yellow solid. The obtained mixture of isomers was further used without separation. HRMS-ESI<sup>+</sup> (*m/z*) calcd for C<sub>29</sub>H<sub>16</sub>ONa<sup>+</sup> ([M + Na]<sup>+</sup>) 403.1093, found 403.1081.

***rac*-9H-Cyclopenta[1,2-*c*:4,3-*c'*]diphenanthren-9-one (5):** A mixture of **7** (2.72 g, 7.15 mmol) and PtCl<sub>2</sub> (190 mg, 0.715 mmol) in toluene (200 mL) was refluxed for 18 h. The reaction mixture was concentrated under reduced pressure, and the crude residue was purified by silica-gel column chromatography with chloroform. The obtained solid was recrystallized from hexane/CH<sub>2</sub>Cl<sub>2</sub> to give *rac*-**5** (2.64 g, 32% from compound **6**) as a red solid. *rac*-**5** can be separated into enantiomerically-pure (*P*)-**5** and (*M*)-**5** by HPLC equipped with a DICEL CHIEAPAK<sup>®</sup> IF-3 column (4.6 mm × 250 mm) [*t*<sub>R</sub> = 3.5 min and 4.2 min (flow rate: 1.0 mL; eluent: CH<sub>2</sub>Cl<sub>2</sub>/hexane = 50/50)]: mp 187-188 °C; <sup>1</sup>H NMR (500 MHz, CDCl<sub>3</sub>) δ = 7.91 (d, *J* = 7.6 Hz, 2H), 7.77 (d, *J* = 7.6 Hz, 2H), 7.65 (d, *J* = 8.2 Hz, 2H), 7.61 (d, *J* = 8.7 Hz, 2H), 7.56 (d, *J* = 8.4 Hz, 2H), 7.54 (d, *J* = 7.8 Hz, 2H), 7.11 (t, *J* = 7.4 Hz, 2H), 6.30 (t, *J* = 7.7 Hz, 2H); <sup>13</sup>C NMR (101 MHz, CDCl<sub>3</sub>) δ = 193.4, 147.2, 138.2, 135.2, 132.1, 130.7, 129.7 (2C), 128.5, 128.0, 127.7, 127.0, 126.7, 123.8, 120.8; HRMS-ESI<sup>+</sup> (*m/z*) calcd for C<sub>29</sub>H<sub>16</sub>ONa<sup>+</sup> ([M + Na]<sup>+</sup>) 403.1093, found 403.1092.

***rac*-9*H*-Cyclopenta[1,2-*c*:4,3-*c'*]diphenanthrene (3a):** A mixture of **5** (50 mg, 0.13 mmol) and hydrazine monohydrate (0.10 mL mg, 3.2 mmol), and KOH (22 mg, 0.40 mmol) in diethylene glycol (6 mL) was heated at 170 °C for 24 h. After cooling to room temperature, the reaction mixture was poured into a solution of concentrated HCl at 0 °C. The resulting colorless precipitate was collected by filtration and washed with water to give a *rac*-**3a** (37 mg, 78%) as a colorless solid. *rac*-**3a** can be separated into enantiomerically-pure (*P*)-**3a** and (*M*)-**3a** by HPLC equipped with a DICELE CHIEAPAK<sup>®</sup> IF-3 column (4.6 mm × 250 mm) [ $t_R$  = 9.2 min and 10.8 min (flow rate: 1.0 mL; eluent: CHCl<sub>3</sub>/hexane = 50/50)]: mp 178-179 °C; <sup>1</sup>H NMR (500 MHz, CDCl<sub>3</sub>)  $\delta$  = 7.92 (d,  $J$  = 7.8 Hz, 2H), 7.88 (d,  $J$  = 7.6 Hz, 2H), 7.82 (d,  $J$  = 8.7 Hz, 2H), 7.71 (d,  $J$  = 8.7 Hz, 2H), 7.62 (d,  $J$  = 7.8 Hz, 2H), 7.53 (d,  $J$  = 8.3 Hz, 2H), 7.09 (dt,  $J$  = 7.3, 1.0 Hz, 2H), 6.26 (dt,  $J$  = 7.7, 1.1 Hz, 2H), 4.35 (s, 2H); <sup>13</sup>C NMR (101 MHz, CDCl<sub>3</sub>)  $\delta$  = 144.1, 138.4, 131.9, 131.5, 130.7, 127.74, 127.71, 127.4, 126.9, 126.43, 126.40, 126.36, 123.2, 122.9, 38.5; HRMS-ESI<sup>+</sup> ( $m/z$ ) calcd for C<sub>29</sub>H<sub>18</sub><sup>+</sup> ( $M^+$ ) 366.1403, found 366.1404.

***rac*-9-Phenyl-9*H*-cyclopenta[1,2-*c*:4,3-*c'*]diphenanthrene (3b):** To a solution of **5** (100 mg, 0.26 mmol) in THF (5 mL), phenyllithium in cyclohexane and diethylether (1.09 M, 0.30 mL, 0.33 mmol) was added dropwise at −78 °C. After stirring −78 °C for 30 min, methanol and water were added to the mixture. The resulting mixture was concentrated under reduced pressure, extracted with CH<sub>2</sub>Cl<sub>2</sub> (twice). The combined organic layers were dried over MgSO<sub>4</sub> and concentrated. The resulting residue was dissolved into CH<sub>2</sub>Cl<sub>2</sub> under Ar atmosphere, and triethylsilane (0.10 mL) and trifluoroacetic acid (0.05 mL) were added to the solution at 0 °C. The resulting mixture was stirred at room temperature for 20 min, and concentrated. The crude residue was purified by silica-gel column chromatography using hexane/CH<sub>2</sub>Cl<sub>2</sub> (3/1) as an eluent to afford **3b** (99 mg, 85% yield for two steps) as a colorless solid. *rac*-**3b** can be separated into enantiomerically-pure (*P*)-**3b** and (*M*)-**3b** by HPLC equipped with a DICELE CHIEAPAK<sup>®</sup> IF-3 column (4.6 mm × 250 mm) [ $t_R$  = 10.2 min and 12.2 min (flow rate: 0.75 mL; eluent: CH<sub>2</sub>Cl<sub>2</sub>/hexane = 10/90)] A crystal suitable for an X-ray diffraction

analysis was obtained by recrystallization by slow evaporation from CH<sub>2</sub>Cl<sub>2</sub>/hexane solution.: <sup>1</sup>H NMR (400 MHz, CDCl<sub>3</sub>) δ 7.87 (d, *J* = 7.8 Hz, 1H), 7.86 (d, *J* = 7.8 Hz, 1H), 7.80–7.78 (m, 2H), 7.73–7.59 (m, 8H), 7.33–7.21 (m, 5H), 7.14–7.09 (m, 2H), 6.33–6.27 (m, 2H), 5.39 (s, 1H); <sup>13</sup>C NMR (126 MHz, CDCl<sub>3</sub>) δ 149.6, 148.2, 141.1, 138.1, 137.7, 132.34, 132.27, 131.7, 131.5, 130.9, 130.8, 129.0, 128.8, 128.5, 128.2, 127.9, 127.6, 127.5, 127.3, 127.0, 126.9, 126.72, 126.70, 126.5, 126.4, 123.4, 123.32, 123.29, 122.8, 55.4; HRMS-ESI<sup>+</sup> (*m/z*) calcd for C<sub>35</sub>H<sub>22</sub><sup>+</sup> (M<sup>+</sup>) 442.1716, found 442.1714.

***rac*-9,9-Diphenyl-9*H*-cyclopenta[1,2-*c*:4,3-*c'*]diphenanthrene (3c):** To a solution of PhMgBr (1.0 M solution in THF, 0.12 mL, 0.12 mmol) was added a mixture of **5** (30 mg, 79 μmol) in THF (1.0 mL). The resulting mixture was stirred for 30 min, and saturated aqueous NH<sub>4</sub>Cl (0.1 mL) was added. The resulting mixture was then filtered through a pad of silica gel and concentrated to give a colorless solid (35 mg). The obtained solid was dissolved in a mixture of trifluoroacetic acid (12 μL, 0.13 mmol), and the resulting mixture was heated at 80 °C for 21 h. After the addition of saturated aqueous NaHCO<sub>3</sub> (0.1 mL), the resulting mixture was concentrated under reduced pressure. The crude residue was purified by silica-gel column chromatography using AcOEt/hexane (1/5) as an eluent to afford *rac*-**3c** (32 mg, 78% yield) as a colorless solid. *rac*-**3c** can be separated into enantiomerically-pure (*P*)-**3c** and (*M*)-**3c** by HPLC equipped with a DICELE CHIEAPAK<sup>®</sup> IF-3 column (4.6 mm × 250 mm) [*t*<sub>R</sub> = 12.2 min and 16.1 min (flow rate: 1.0 mL; eluent: CHCl<sub>3</sub>/hexane = 25/75)]: mp 185-186 °C; <sup>1</sup>H NMR (500 MHz, CDCl<sub>3</sub>) δ = 7.85 (d, *J* = 8.0 Hz, 2H), 7.76–7.67 (m, 8H), 7.60 (d, *J* = 8.0 Hz, 2H), 7.43–7.41 (m, 4H), 7.26–7.24 (m, 8H), 7.09 (t, *J* = 7.4, 2H), 6.31 (dt, *J* = 7.7, 2H), 4.35 (s, 2H); <sup>13</sup>C NMR (101 MHz, CDCl<sub>3</sub>) δ = 152.1, 145.2, 137.2, 132.3, 131.7, 130.9, 128.8, 128.6, 128.5, 128.0, 127.4, 127.1, 126.9, 126.8, 126.6, 126.5, 123.7, 123.4, 66.0; HRMS-ESI<sup>+</sup> (*m/z*) calcd for C<sub>41</sub>H<sub>26</sub> (M<sup>+</sup>) 518.2029, found 518.2013.

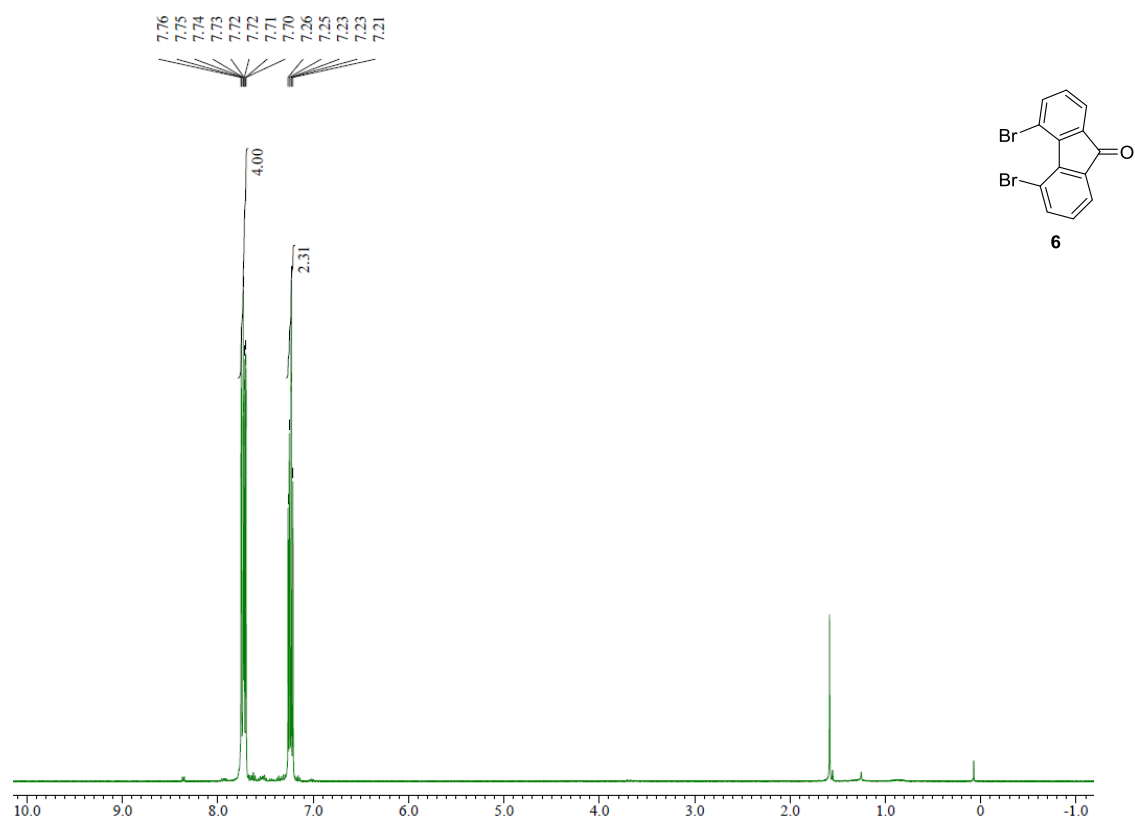

**Figure S1.** <sup>1</sup>H NMR spectrum of **6** (CDCl<sub>3</sub>).

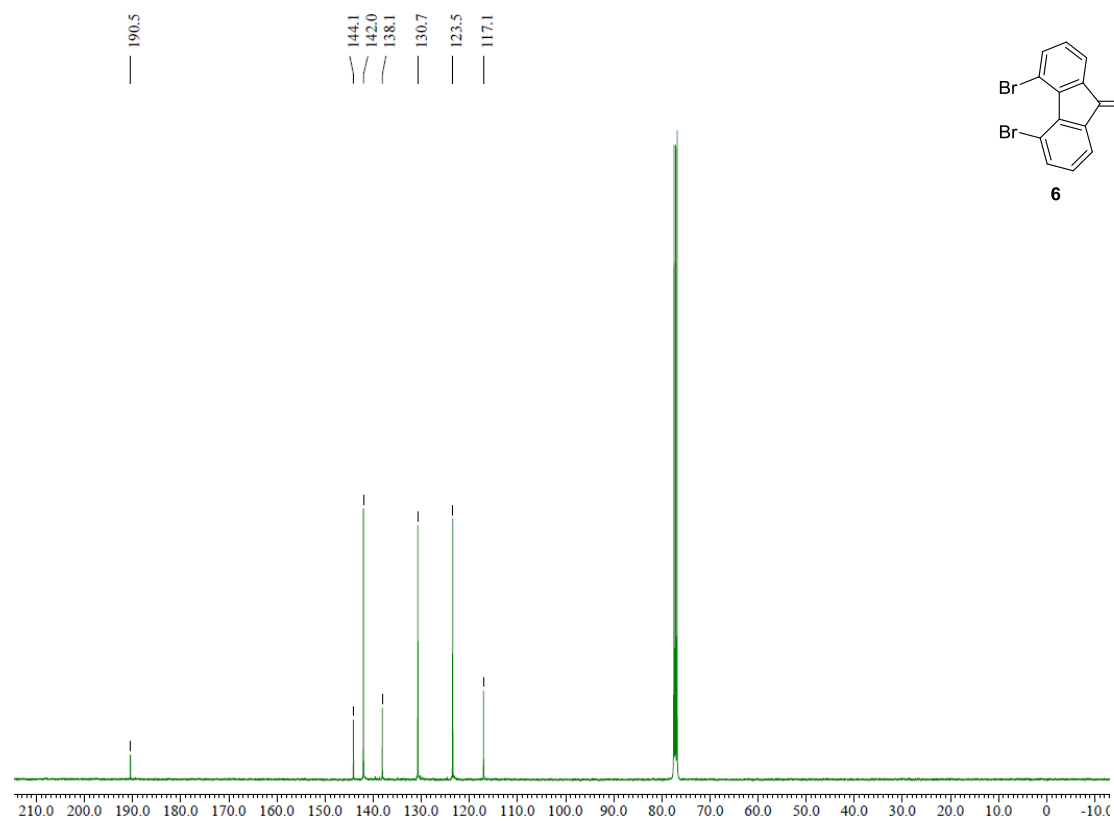

**Figure S2.** <sup>13</sup>C NMR spectrum of **6** (CDCl<sub>3</sub>).

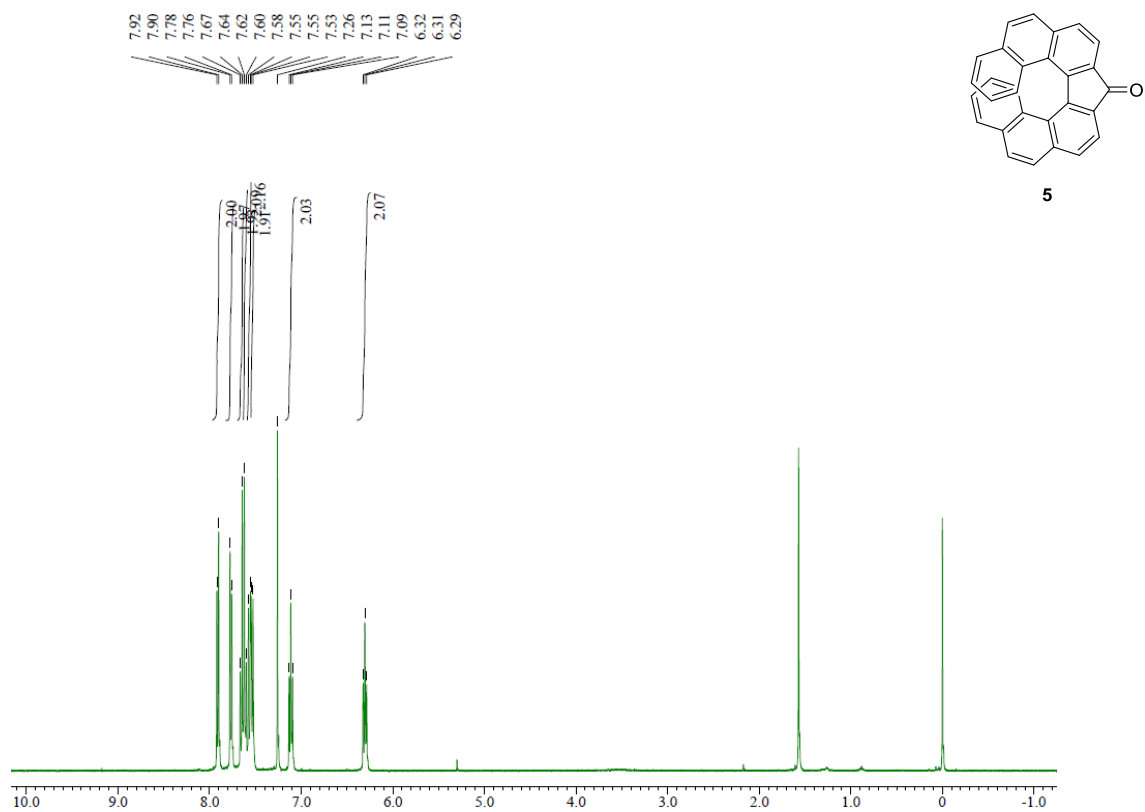

**Figure S3.** <sup>1</sup>H NMR spectrum of **5** (CDCl<sub>3</sub>).

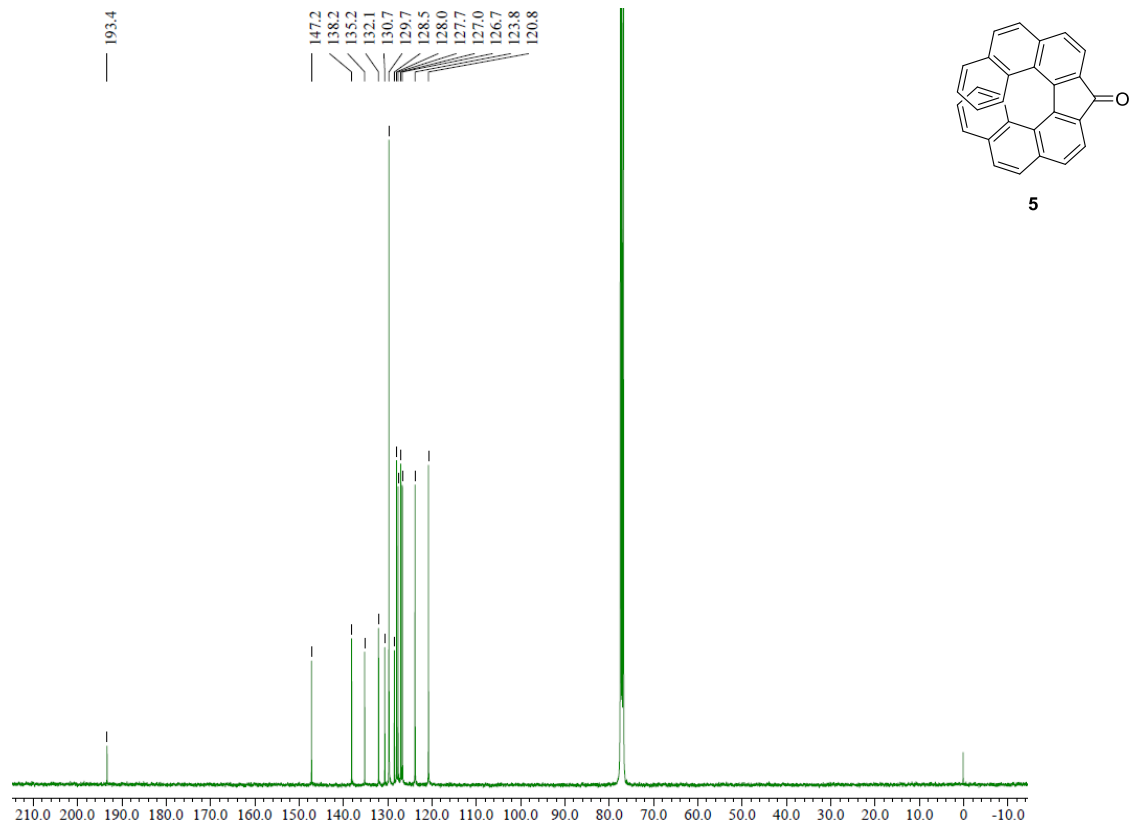

**Figure S4.** <sup>13</sup>C NMR spectrum of **5** (CDCl<sub>3</sub>).



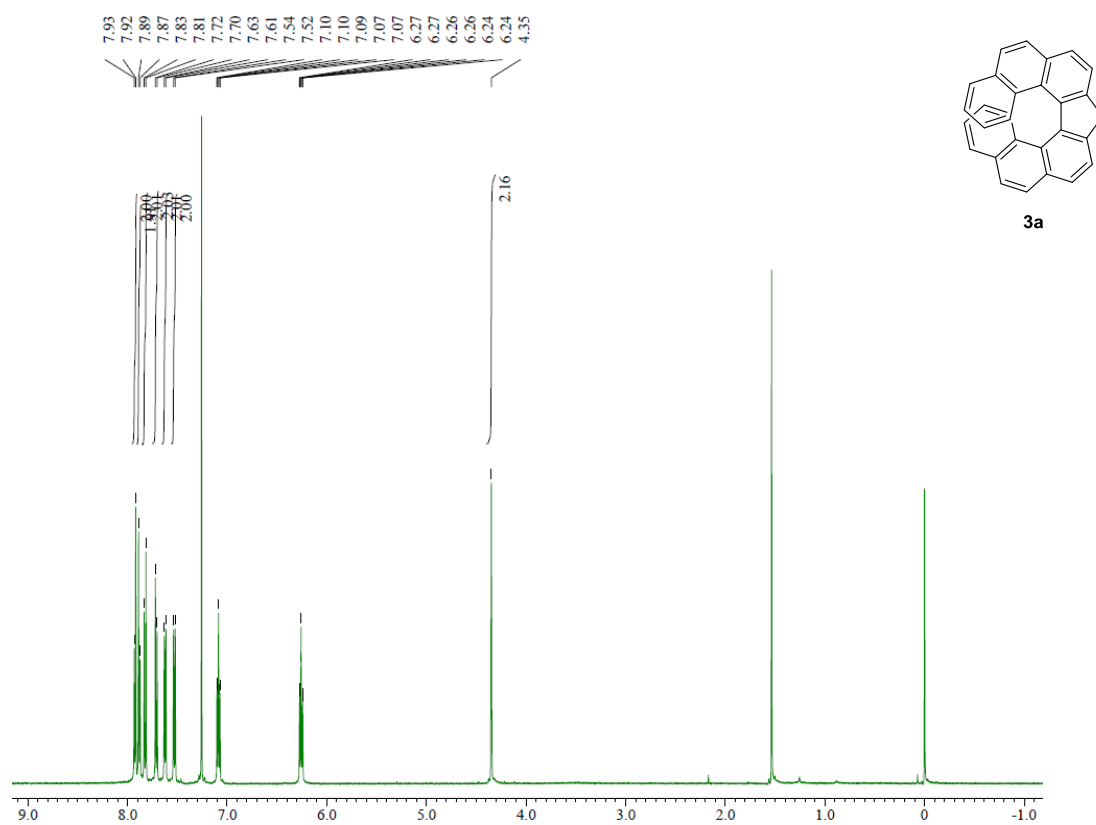

**Figure S5.** <sup>1</sup>H NMR spectrum of **3a** (CDCl<sub>3</sub>).

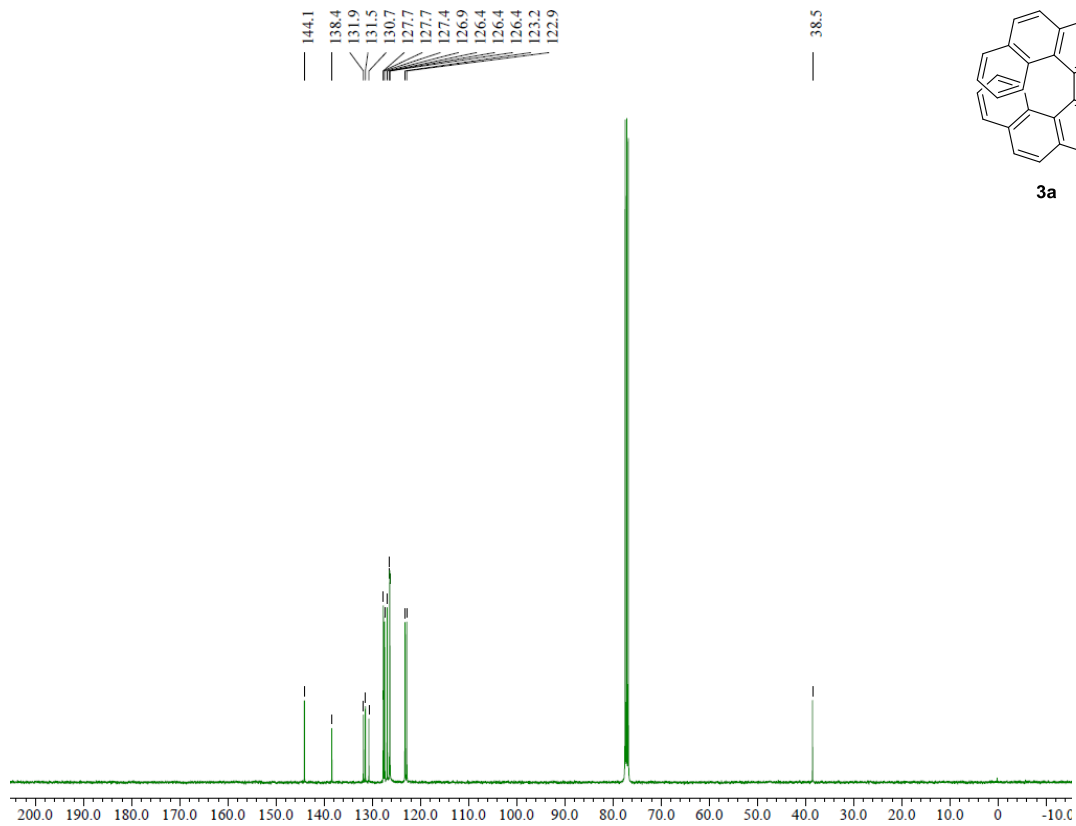

**Figure S6.** <sup>13</sup>C NMR spectrum of **3a** (CDCl<sub>3</sub>).

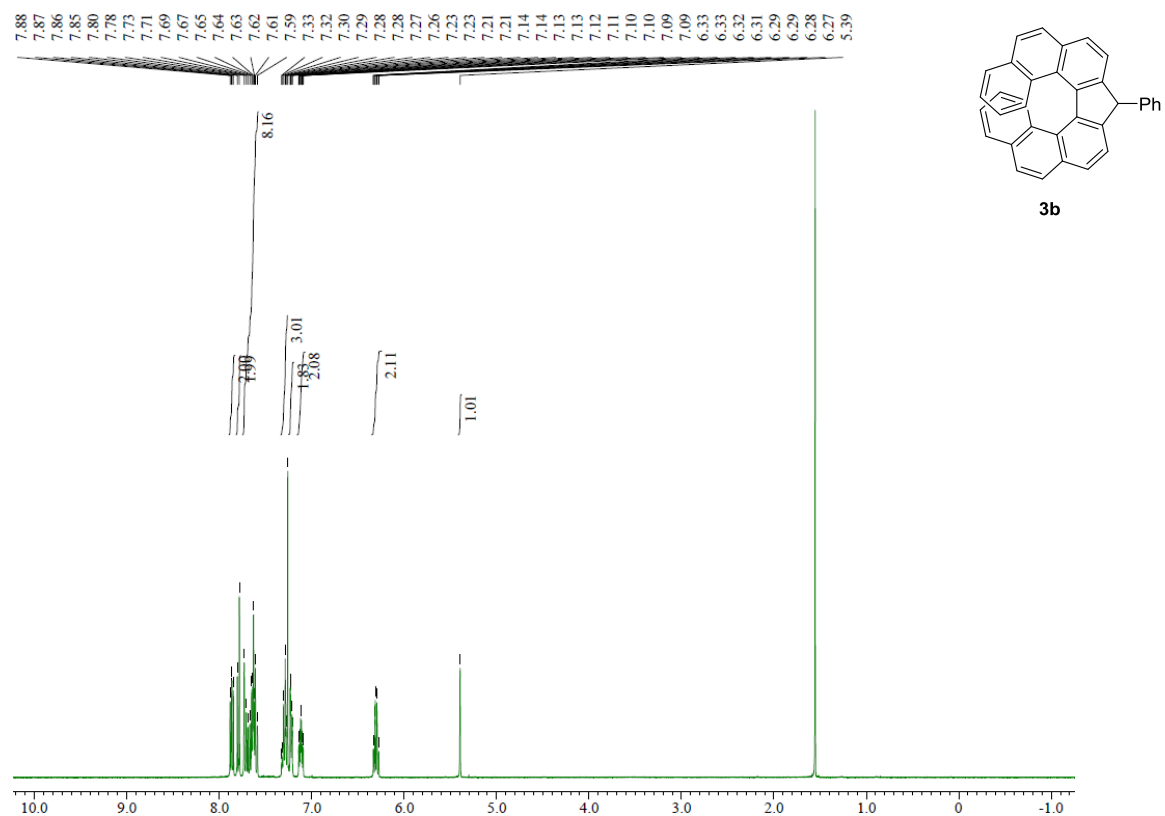

**Figure S7.** <sup>1</sup>H NMR spectrum of **3b** (CDCl<sub>3</sub>).

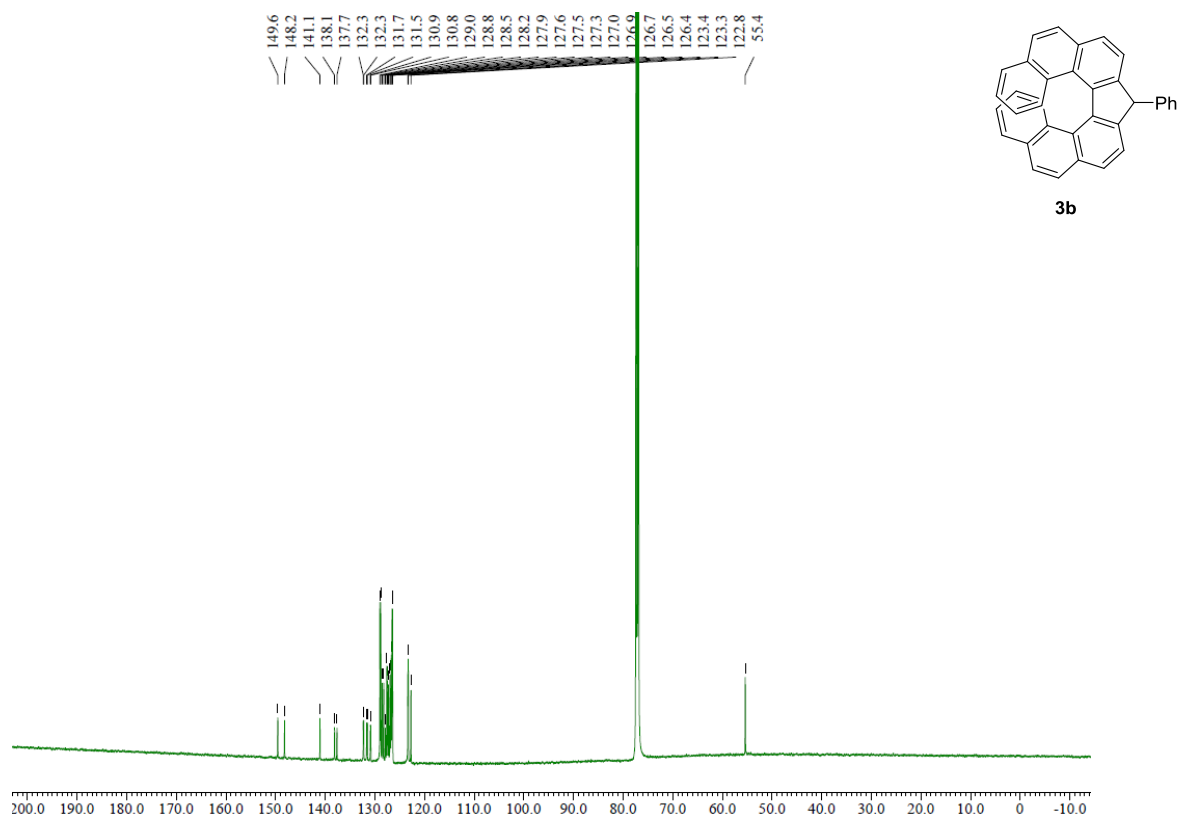

**Figure S8.** <sup>13</sup>C NMR spectrum of **3b** (CDCl<sub>3</sub>).

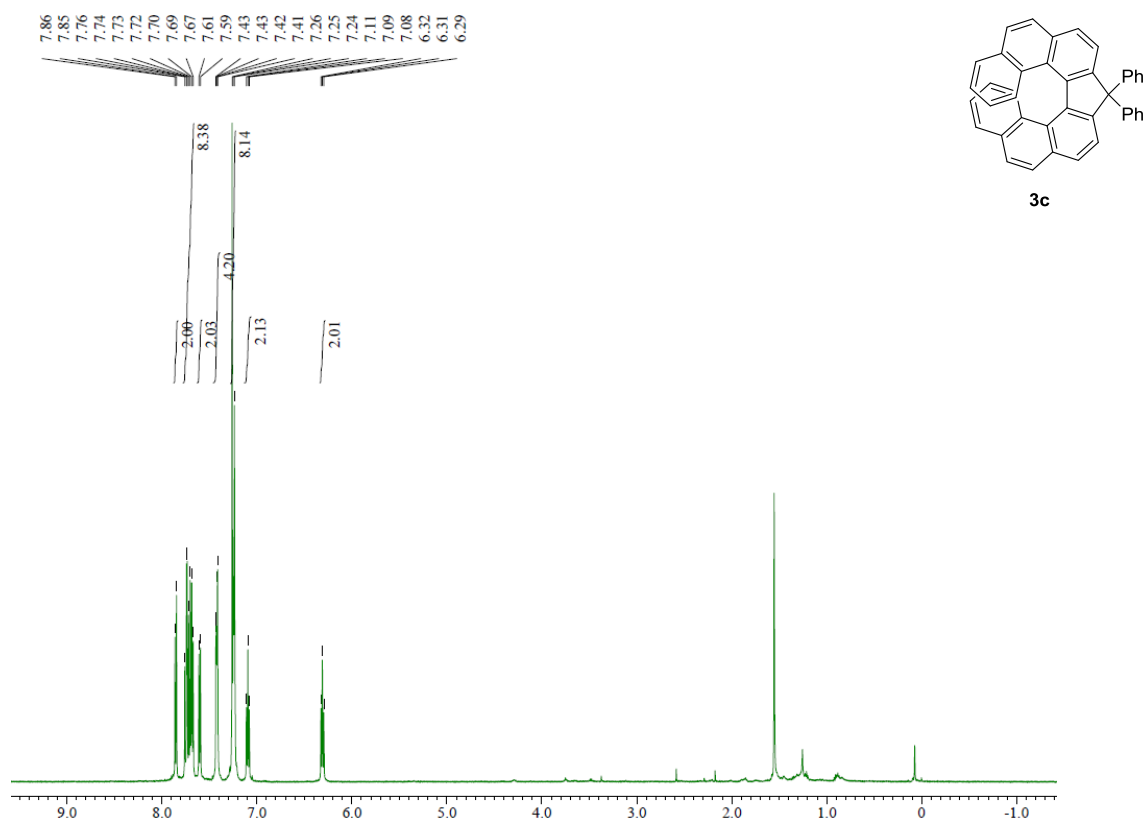

**Figure S9.** <sup>1</sup>H NMR spectrum of **3c** (CDCl<sub>3</sub>).

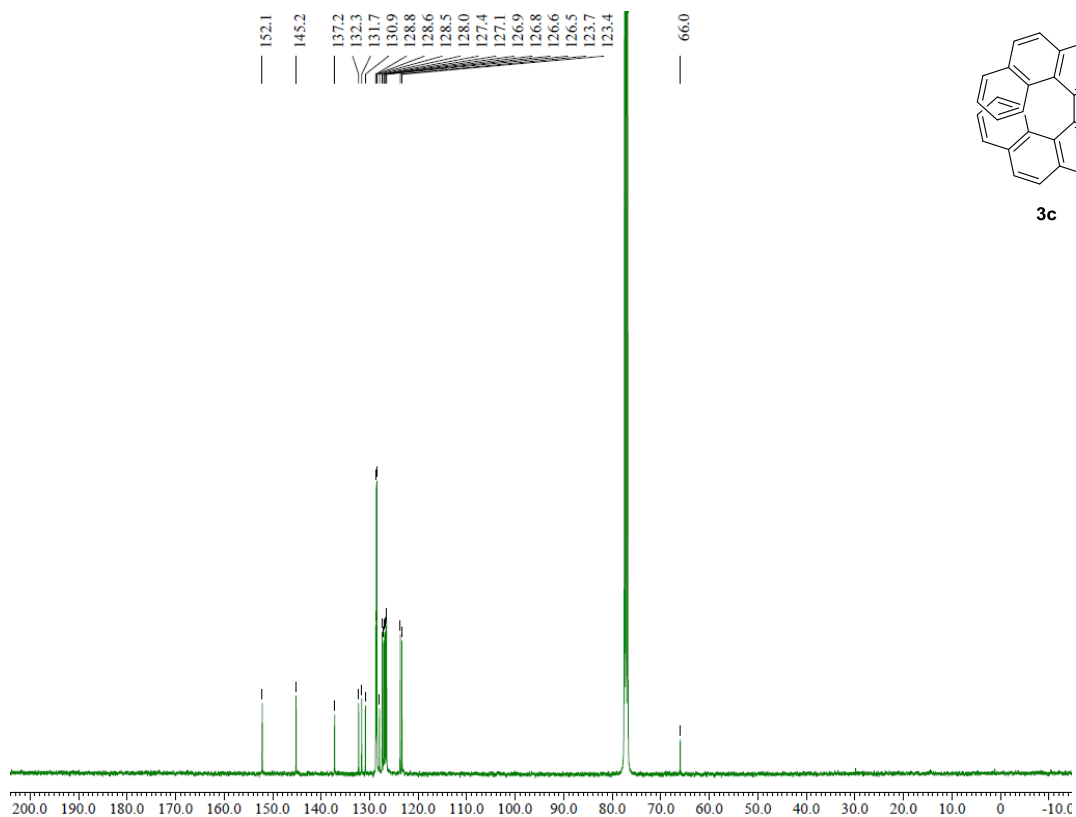

**Figure S10.** <sup>13</sup>C NMR spectrum of **3c** (CDCl<sub>3</sub>).

**X-ray Crystallography.** For X-ray crystallographical analyses, suitable single crystals were selected under ambient conditions, mounted with perfluoroalkyl ether to the glass fiber, and transferred to the goniometer of a VariMax diffractometer with a graphite-monochromated Mo-K $\alpha$  radiation ( $\lambda = 0.71075$  Å) or Cu-K $\alpha$  irradiation ( $\lambda = 1.54187$  Å). The structures were solved by a direct method (SIR 2002<sup>2</sup>) and refined by full-matrix least-squares techniques against  $F^2$  (SHELXL-97<sup>3</sup>). The intensities were corrected for Lorentz and polarization effects. All non-hydrogen atoms were refined anisotropically. Hydrogen atoms were placed using AFIX instructions.

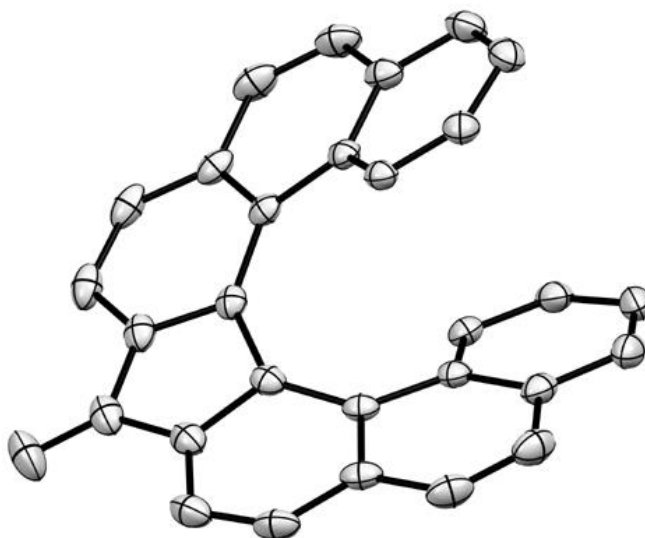

**Figure S11.** ORTEP drawing of **5** (50% thermal ellipsoids. All hydrogen atoms are omitted for clarity.)

**Table S1.** Crystallographic data and structure refinement details for **5**

|                                        |                                                                    |                     |
|----------------------------------------|--------------------------------------------------------------------|---------------------|
| Formula                                | $\text{C}_{29}\text{H}_{16}\text{O}$                               |                     |
| Formula weight                         | 380.42                                                             |                     |
| Temperature                            | 293(2) K                                                           |                     |
| Wavelength                             | 0.71075 Å                                                          |                     |
| Crystal system                         | 'orthorhombic'                                                     |                     |
| Space group                            | 'Pbca'                                                             |                     |
| Unit cell dimensions                   | $a = 13.816(2)$ Å                                                  | $\alpha = 90^\circ$ |
|                                        | $b = 13.862(3)$ Å                                                  | $\beta = 90^\circ$  |
|                                        | $c = 19.248(4)$ Å                                                  | $\gamma = 90^\circ$ |
| Volume                                 | $3686.3(12)$ Å <sup>3</sup>                                        |                     |
| Z                                      | 8                                                                  |                     |
| Density (calculated)                   | $1.371$ g/cm <sup>3</sup>                                          |                     |
| Absorption coefficient                 | $0.082$ mm <sup>-1</sup>                                           |                     |
| F(000)                                 | 1584                                                               |                     |
| Crystal size                           | $0.25 \times 0.20 \times 0.10$ mm <sup>3</sup>                     |                     |
| Theta range for data collection        | $3.30$ to $25.00^\circ$                                            |                     |
| Index ranges                           | $-16 \leq h \leq 16$ , $-16 \leq k \leq 15$ , $-17 \leq l \leq 22$ |                     |
| Reflections collected                  | 23178                                                              |                     |
| Independent reflections                | 3219 [ $R_{\text{int}} = 0.0420$ ]                                 |                     |
| Completeness to $\theta = 25.00^\circ$ | 99.0%                                                              |                     |
| Max. and min. transmission             | 0.9919 and 0.9799                                                  |                     |
| Refinement method                      | Full-matrix least-squares on $F^2$                                 |                     |
| Data / restraints / parameters         | 3219 / 0 / 271                                                     |                     |
| Goodness-of-fit on $F^2$               | 1.071                                                              |                     |
| Final R indices [ $I > 2\sigma(I)$ ]   | $R_1 = 0.0394$ , $wR_2 = 0.1259$                                   |                     |
| R indices (all data)                   | $R_1 = 0.0439$ , $wR_2 = 0.1324$                                   |                     |
| Largest diff. peak and hole            | $0.193$ and $-0.180$ e/Å <sup>3</sup>                              |                     |

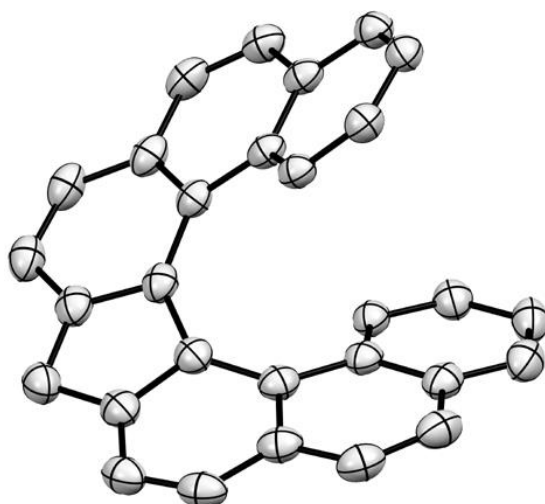

**Figure S12.** ORTEP drawing of **3a** (50% thermal ellipsoids. All hydrogen atoms are omitted for clarity.)

**Table S2.** Crystallographic data and structure refinement details for **3a**

|                                              |                                                                 |                     |
|----------------------------------------------|-----------------------------------------------------------------|---------------------|
| Formula                                      | C <sub>29</sub> H <sub>18</sub>                                 |                     |
| Formula weight                               | 366.43                                                          |                     |
| Temperature                                  | 93(2) K                                                         |                     |
| Wavelength                                   | 1.54187 Å                                                       |                     |
| Crystal system                               | 'orthorhombic'                                                  |                     |
| Space group                                  | 'P2 <sub>1</sub> 2 <sub>1</sub> 2 <sub>1</sub> '                |                     |
| Unit cell dimensions                         | <i>a</i> = 8.051(3) Å                                           | $\alpha = 90^\circ$ |
|                                              | <i>b</i> = 14.010(6) Å                                          | $\beta = 90^\circ$  |
|                                              | <i>c</i> = 16.659(6) Å                                          | $\gamma = 90^\circ$ |
| Volume                                       | 1879.0(13) Å <sup>3</sup>                                       |                     |
| Z                                            | 4                                                               |                     |
| Density (calculated)                         | 1.295 g/cm <sup>3</sup>                                         |                     |
| Absorption coefficient                       | 0.557 mm <sup>-1</sup>                                          |                     |
| F(000)                                       | 768                                                             |                     |
| Crystal size                                 | 0.20 × 0.20 × 0.20 mm <sup>3</sup>                              |                     |
| Theta range for data collection              | 4.123 to 73.770°                                                |                     |
| Index ranges                                 | -10 ≤ <i>h</i> ≤ 9, -17 ≤ <i>k</i> ≤ 17, -20 ≤ <i>l</i> ≤ 20    |                     |
| Reflections collected                        | 28093                                                           |                     |
| Independent reflections                      | 3735 [ <i>R</i> <sub>int</sub> = 0.0515]                        |                     |
| Completeness to theta = 25.00°               | 99.1%                                                           |                     |
| Refinement method                            | Full-matrix least-squares on <i>F</i> <sup>2</sup>              |                     |
| Data / restraints / parameters               | 3735/ 0 / 262                                                   |                     |
| Goodness-of-fit on <i>F</i> <sup>2</sup>     | 1.071                                                           |                     |
| Final R indices [ <i>I</i> > 2σ( <i>I</i> )] | <i>R</i> <sub>1</sub> = 0.0438, <i>wR</i> <sub>2</sub> = 0.1070 |                     |
| R indices (all data)                         | <i>R</i> <sub>1</sub> = 0.0456, <i>wR</i> <sub>2</sub> = 0.1087 |                     |
| Largest diff. peak and hole                  | 0.124 and -0.217 e/Å <sup>3</sup>                               |                     |

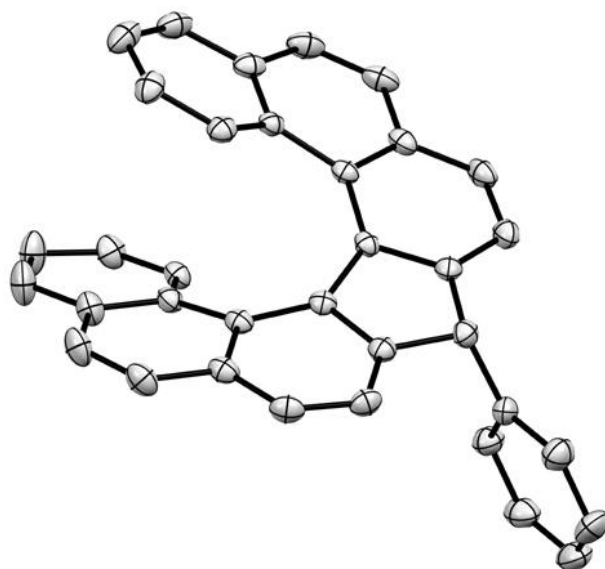

**Figure S13.** ORTEP drawing of **3b** (50% thermal ellipsoids. All hydrogen atoms are omitted for clarity.)

**Table S3.** Crystallographic data and structure refinement details for **3b**

|                                      |                                                              |                            |
|--------------------------------------|--------------------------------------------------------------|----------------------------|
| Formula                              | $\text{C}_{35}\text{H}_{22}$                                 |                            |
| Formula weight                       | 442.52                                                       |                            |
| Temperature                          | 93(2) K                                                      |                            |
| Wavelength                           | 0.71075 Å                                                    |                            |
| Crystal system                       | 'monoclinic'                                                 |                            |
| Space group                          | ' $P2_1/c$ '                                                 |                            |
| Unit cell dimensions                 | $a = 12.558(4)$ Å                                            | $\alpha = 90^\circ$        |
|                                      | $b = 14.180(4)$ Å                                            | $\beta = 102.720(5)^\circ$ |
|                                      | $c = 26.385(8)$ Å                                            | $\gamma = 90^\circ$        |
| Volume                               | $4583(2)$ Å <sup>3</sup>                                     |                            |
| Z                                    | 8                                                            |                            |
| Density (calculated)                 | 1.283 Mg/cm <sup>3</sup>                                     |                            |
| Absorption coefficient               | 0.073 mm <sup>-1</sup>                                       |                            |
| F(000)                               | 1856                                                         |                            |
| Crystal size                         | $0.500 \times 0.500 \times 0.05$ mm <sup>3</sup>             |                            |
| Theta range for data collection      | 2.456 to 27.499 °                                            |                            |
| Index ranges                         | $-16 \leq h \leq 16, -18 \leq k \leq 18, -34 \leq l \leq 34$ |                            |
| Reflections collected                | 72605                                                        |                            |
| Independent reflections              | 10523                                                        |                            |
| $R_{\text{int}}$                     | 0.0874                                                       |                            |
| Data / restraints / parameters       | 10523 / 0 / 631                                              |                            |
| Goodness-of-fit on $F^2$             | 1.257                                                        |                            |
| Final R indices [ $I > 2\sigma(I)$ ] | $R_1 = 0.0817, wR_2 = 0.1464$                                |                            |
| R indices (all data)                 | $R_1 = 0.0985, wR_2 = 0.1540$                                |                            |
| Largest diff. peak and hole          | 0.227 and $-0.236$ e/Å <sup>3</sup>                          |                            |

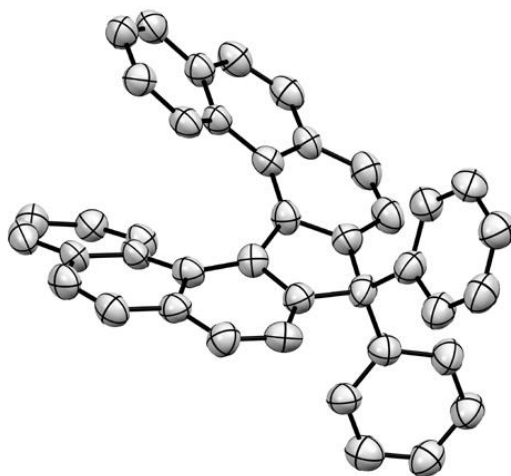

**Figure S14.** ORTEP drawing of **3c** (50% thermal ellipsoids. All hydrogen atoms are omitted for clarity.)

**Table S4.** Crystallographic data and structure refinement details for **3c**

|                                        |                                                                    |                     |
|----------------------------------------|--------------------------------------------------------------------|---------------------|
| Formula                                | $\text{C}_{41}\text{H}_{26}$                                       |                     |
| Formula weight                         | 5182.62                                                            |                     |
| Temperature                            | 296(2) K                                                           |                     |
| Wavelength                             | 1.54187 Å                                                          |                     |
| Crystal system                         | 'orthorhombic'                                                     |                     |
| Space group                            | ' $P2_12_12_1$ '                                                   |                     |
| Unit cell dimensions                   | $a = 9.8499(2)$ Å                                                  | $\alpha = 90^\circ$ |
|                                        | $b = 11.1882(4)$ Å                                                 | $\beta = 90^\circ$  |
|                                        | $c = 24.6237(4)$ Å                                                 | $\gamma = 90^\circ$ |
| Volume                                 | $2713.60(9)$ Å <sup>3</sup>                                        |                     |
| Z                                      | 4                                                                  |                     |
| Density (calculated)                   | $1.269$ g/cm <sup>3</sup>                                          |                     |
| Absorption coefficient                 | $0.546$ mm <sup>-1</sup>                                           |                     |
| F(000)                                 | 1088                                                               |                     |
| Crystal size                           | $0.10 \times 0.10 \times 0.10$ mm <sup>3</sup>                     |                     |
| Theta range for data collection        | $3.59$ to $66.97^\circ$                                            |                     |
| Index ranges                           | $-11 \leq h \leq 11$ , $-13 \leq k \leq 13$ , $-29 \leq l \leq 29$ |                     |
| Reflections collected                  | 31160                                                              |                     |
| Independent reflections                | 4830 [ $R_{\text{int}} = 0.0336$ ]                                 |                     |
| Completeness to $\theta = 25.00^\circ$ | 100%                                                               |                     |
| Max. and min. transmission             | 0.9474 and 0.9474                                                  |                     |
| Refinement method                      | Full-matrix least-squares on $F^2$                                 |                     |
| Data / restraints / parameters         | 4830 / 0 / 371                                                     |                     |
| Goodness-of-fit on $F^2$               | 1.777                                                              |                     |
| Final R indices [ $I > 2\sigma(I)$ ]   | $R_1 = 0.0758$ , $wR_2 = 0.2675$                                   |                     |
| R indices (all data)                   | $R_1 = 0.1146$ , $wR_2 = 0.1882$                                   |                     |
| Absolute structure parameter           | $-1(4)$                                                            |                     |
| Largest diff. peak and hole            | $0.359$ and $-0.312$ e/Å <sup>3</sup>                              |                     |



(a)

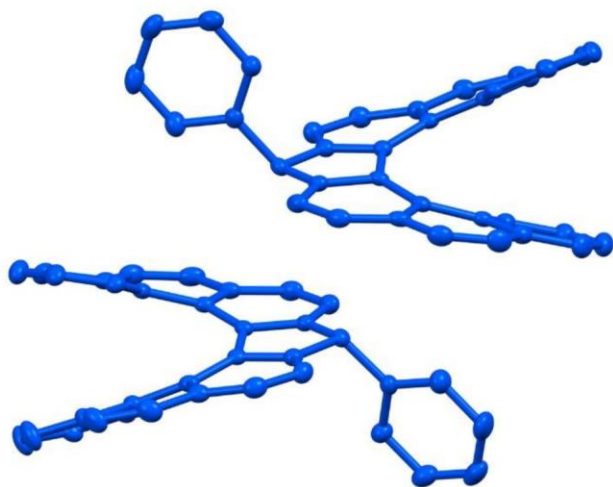

(b)

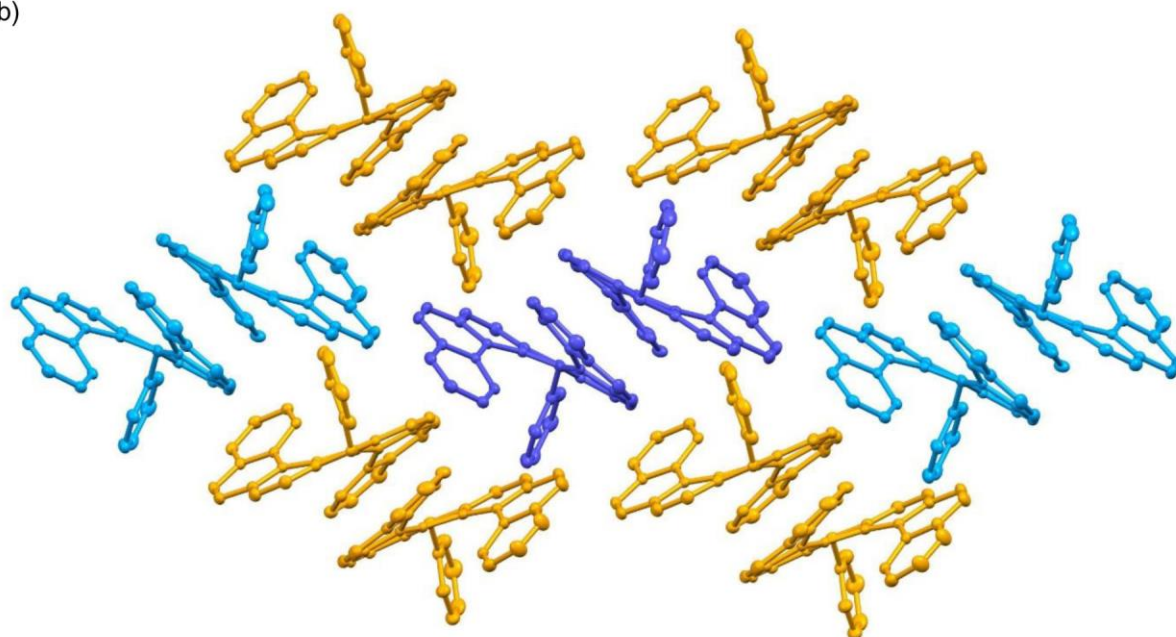

**Figure S15.** (a) Dimer and (b) packing structures of *rac*-3b.

**Table S5.** Coordinates (Å) and Absolute Energy of the Optimized Structure for **3a**<sup>a</sup>

| atom                                                | x         | y         | z         | atom | x         | y         | z         |
|-----------------------------------------------------|-----------|-----------|-----------|------|-----------|-----------|-----------|
| C                                                   | -0.548767 | -1.028563 | -1.553853 | C    | -4.080074 | -0.077137 | 0.576651  |
| H                                                   | 0.208705  | -0.281737 | -1.751328 | H    | -5.028248 | 0.204976  | 1.028165  |
| C                                                   | -1.766554 | 0.584573  | -0.040717 | C    | -3.372894 | 2.264980  | 0.818254  |
| C                                                   | -2.666373 | -1.685144 | -0.558245 | H    | -4.373439 | 2.489418  | 1.179288  |
| C                                                   | 1.626227  | -0.713185 | 0.692207  | C    | -2.532666 | -2.947918 | -1.180472 |
| C                                                   | 1.142748  | 2.923581  | -0.270364 | H    | -3.327558 | -3.678210 | -1.046903 |
| C                                                   | -0.745667 | 1.587627  | 0.067805  | C    | 3.872646  | -1.345366 | -0.138616 |
| C                                                   | -1.440012 | -3.241162 | -1.972754 | H    | 4.643940  | -2.104428 | -0.244646 |
| H                                                   | -1.355307 | -4.211614 | -2.454357 | C    | 2.666793  | -1.684565 | 0.558323  |
| C                                                   | -1.626019 | -0.713578 | -0.692156 | C    | 3.372206  | 2.265591  | -0.818856 |
| C                                                   | 0.549032  | -1.028387 | 1.553963  | H    | 4.372540  | 2.490077  | -1.180449 |
| H                                                   | -0.208576 | -0.281723 | 1.751414  | C    | 3.064786  | 0.933291  | -0.459261 |
| C                                                   | -1.143348 | 2.923406  | 0.270724  | C    | 2.533357  | -2.947362 | 1.180615  |
| C                                                   | 0.745302  | 1.587828  | -0.067615 | H    | 3.328341  | -3.677537 | 1.046930  |
| C                                                   | 1.766473  | 0.584840  | 0.040645  | C    | -0.000329 | 3.863167  | 0.000372  |
| C                                                   | -3.065154 | 0.932804  | 0.458794  | H    | 0.228906  | 4.522656  | 0.850086  |
| C                                                   | -3.872397 | -1.346155 | 0.138586  | H    | -0.229556 | 4.523245  | -0.848870 |
| H                                                   | -4.643407 | -2.105483 | 0.244814  | C    | 1.440810  | -3.240783 | 1.972933  |
| C                                                   | -0.454737 | -2.258789 | -2.179639 | H    | 1.356312  | -4.211203 | 2.454632  |
| H                                                   | 0.385422  | -2.461744 | -2.838045 | C    | 2.442261  | 3.272261  | -0.648398 |
| C                                                   | -2.442973 | 3.271845  | 0.648271  | H    | 2.701941  | 4.311607  | -0.833273 |
| H                                                   | -2.702922 | 4.311107  | 0.833300  | C    | 4.079933  | -0.076387 | -0.577058 |
| C                                                   | 0.455332  | -2.258572 | 2.179812  | H    | 5.028015  | 0.205845  | -1.028714 |
| H                                                   | -0.384755 | -2.461697 | 2.838260  |      |           |           |           |
| absolute energy <i>E</i> (B3LYP): -1115.94597398 au |           |           |           |      |           |           |           |

<sup>a</sup>Calculated by DFT method [B3LYP/6-31G(d)]

**Table S6.** Coordinates (Å) and Absolute Energy of the Optimized Structure for **3b**<sup>a</sup>

| atom | x         | y         | z         | atom | x         | y         | z         |
|------|-----------|-----------|-----------|------|-----------|-----------|-----------|
| C    | -2.668076 | -0.428945 | -0.971459 | H    | 0.557958  | 4.983093  | -1.323112 |
| H    | -2.955447 | -0.745170 | -1.986321 | C    | 2.780289  | 0.734340  | 2.457397  |
| C    | 0.322464  | 1.705567  | -0.262360 | H    | 2.932318  | -0.074703 | 3.166510  |
| C    | 0.721236  | -1.806596 | -0.236961 | C    | -3.951079 | -0.250445 | -0.169869 |
| C    | 1.462275  | 1.715930  | 0.648739  | C    | 3.789424  | -0.201285 | -1.781530 |
| C    | -1.962548 | -2.771661 | -0.095095 | H    | 4.033624  | 0.651678  | -2.408698 |
| H    | -2.985428 | -3.137575 | -0.113790 | C    | -3.905318 | 0.103032  | 1.187208  |
| C    | -1.305689 | 3.105755  | -1.500083 | H    | -2.941638 | 0.247536  | 1.668710  |
| H    | -1.558643 | 4.073568  | -1.925693 | C    | 2.004786  | 4.014970  | -0.097010 |
| C    | -0.385362 | -0.903429 | -0.370928 | H    | 2.680474  | 4.866300  | -0.065429 |
| C    | 0.417591  | -3.130961 | 0.223078  | C    | 3.669534  | 1.823945  | 2.431490  |
| C    | -1.681822 | -1.446948 | -0.438588 | H    | 4.520559  | 1.852198  | 3.106603  |
| C    | 2.104099  | -1.527160 | -0.610075 | C    | 3.431081  | 2.872284  | 1.564480  |
| C    | -0.919596 | -3.580737 | 0.312113  | H    | 4.081420  | 3.744101  | 1.563186  |
| H    | -1.106799 | -4.594533 | 0.657069  | C    | 2.786817  | -3.680765 | 0.405288  |
| C    | 3.132426  | -2.451194 | -0.245987 | H    | 3.585414  | -4.361151 | 0.690981  |
| C    | -0.052957 | 2.953106  | -0.861737 | C    | -5.079999 | 0.269966  | 1.917385  |
| C    | 1.706370  | 0.684948  | 1.586687  | H    | -5.026845 | 0.544360  | 2.967739  |
| H    | 1.024678  | -0.153230 | 1.642968  | C    | 4.807206  | -1.069445 | -1.346881 |
| C    | -0.517912 | 0.577300  | -0.548093 | H    | 5.841723  | -0.880575 | -1.620613 |
| C    | -1.812301 | 0.818844  | -1.042156 | C    | 4.475072  | -2.182129 | -0.598747 |
| C    | -2.216825 | 2.068762  | -1.518670 | H    | 5.242963  | -2.889153 | -0.293046 |
| H    | -3.219709 | 2.207227  | -1.913537 | C    | -6.323350 | 0.086607  | 1.303627  |
| C    | 2.473301  | -0.427593 | -1.420311 | H    | -7.238875 | 0.217302  | 1.874311  |
| H    | 1.706250  | 0.240474  | -1.788639 | C    | -6.380327 | -0.265531 | -0.044135 |
| C    | 1.484183  | -4.024603 | 0.580393  | H    | -7.340905 | -0.412019 | -0.531223 |
| H    | 1.217997  | -4.993803 | 0.995383  | C    | -5.199766 | -0.432884 | -0.774159 |
| C    | 2.320206  | 2.858863  | 0.689555  | H    | -5.250465 | -0.709694 | -1.825165 |
| C    | 0.841130  | 4.075389  | -0.795638 |      |           |           |           |

absolute energy  $E$  (B3LYP): -1346.99097542 au<sup>a</sup>Calculated by DFT method [B3LYP/6-31G(d)]

**Table S7.** Coordinates (Å) and Absolute Energy of the Optimized Structure for **3c<sup>a</sup>**

| atom | x         | y         | z         | atom | x         | y         | z         |
|------|-----------|-----------|-----------|------|-----------|-----------|-----------|
| C    | 2.344287  | -1.740650 | 0.250438  | H    | -0.830048 | 3.879523  | 2.332233  |
| C    | -1.289189 | -1.028618 | -0.568249 | C    | 1.732432  | -3.761700 | -1.643922 |
| C    | 0.042511  | 0.699264  | 0.262614  | H    | 1.459833  | -4.551894 | -2.339301 |
| C    | 3.322055  | -2.703625 | -0.150993 | C    | 4.578789  | 2.740465  | -0.496382 |
| C    | 1.051681  | 1.706384  | 0.426512  | H    | 5.314047  | 3.467890  | -0.159882 |
| C    | 0.716073  | 2.820911  | 1.263430  | C    | 4.859963  | -1.901764 | 1.557022  |
| C    | 3.871233  | -1.011342 | 2.013241  | H    | 5.825730  | -1.948326 | 2.052918  |
| H    | 4.064640  | -0.379918 | 2.875990  | C    | 4.578745  | -2.740386 | 0.496292  |
| C    | 1.051703  | -1.706214 | -0.426751 | H    | 5.314014  | -3.467793 | 0.159776  |
| C    | 2.344312  | 1.740746  | -0.250599 | C    | 4.860064  | 1.901763  | -1.557033 |
| C    | 2.996056  | 3.676521  | 1.152185  | H    | 5.825850  | 1.948312  | -2.052892 |
| H    | 3.761019  | 4.386963  | 1.456067  | C    | -3.122769 | -0.578030 | 1.151827  |
| C    | 3.322078  | 2.703725  | 0.150861  | C    | -2.701961 | 1.696173  | -1.885546 |
| C    | 0.042543  | -0.699089 | -0.262935 | H    | -1.792368 | 2.215267  | -1.603311 |
| C    | 1.732396  | 3.761833  | 1.643701  | C    | -4.299656 | 0.071688  | 1.558770  |
| H    | 1.459783  | 4.552045  | 2.339055  | H    | -4.656143 | 0.934889  | 1.005465  |
| C    | 0.716106  | -2.820777 | -1.263649 | C    | -1.624581 | 2.174125  | 1.296145  |
| C    | -2.267864 | 0.000025  | -0.000091 | H    | -2.657415 | 2.373360  | 1.563326  |
| C    | -1.624540 | -2.173962 | -1.296453 | C    | -3.123193 | 0.577903  | -1.151627 |
| H    | -2.657376 | -2.373212 | -1.563631 | C    | -5.033635 | 0.384461  | -2.654052 |
| C    | 3.871366  | 1.011309  | -2.013247 | H    | -5.943059 | -0.135907 | -2.943597 |
| H    | 4.064831  | 0.379813  | -2.875932 | C    | -4.605027 | -1.503257 | 3.371688  |
| C    | 2.646618  | -0.935625 | 1.374059  | H    | -5.177403 | -1.862831 | 4.222563  |
| H    | 1.894922  | -0.260805 | 1.761356  | C    | -3.436014 | 2.154544  | -2.981325 |
| C    | -1.289218 | 1.028749  | 0.567960  | H    | -3.087890 | 3.026281  | -3.529376 |
| C    | -2.701145 | -1.696257 | 1.885556  | C    | -5.032739 | -0.384828 | 2.654821  |
| H    | -1.791589 | -2.215238 | 1.603028  | H    | -5.942138 | 0.135414  | 2.944676  |
| C    | -0.611624 | -3.018433 | -1.705773 | C    | -3.434807 | -2.154727 | 2.981572  |
| H    | -0.829994 | -3.879402 | -2.332476 | H    | -3.086405 | -3.026437 | 3.529490  |
| C    | 2.646713  | 0.935632  | -1.374136 | C    | -4.300140 | -0.071929 | -1.558216 |
| H    | 1.895043  | 0.260772  | -1.761414 | H    | -4.656387 | -0.935170 | -1.004812 |
| C    | 2.996083  | -3.676381 | -1.152374 | C    | -4.606291 | 1.502927  | -3.371060 |
| H    | 3.761069  | -4.386801 | -1.456251 | H    | -5.178972 | 1.862429  | -4.221761 |
| C    | -0.611675 | 3.018576  | 1.705498  |      |           |           |           |

absolute energy  $E$  (B3LYP): -1578.02594106 au<sup>a</sup>Calculated by DFT method [B3LYP/6-31G(d)]

**Table S8.** The selected absorption peaks of **3** calculated by TD-DFT method [B3LYP/6-31G(d)]

|           | electron transition   | transition energy (eV) | wavelength (nm) | main transition configuration (CI expansion coefficient)                                | oscillator strength $f$ |
|-----------|-----------------------|------------------------|-----------------|-----------------------------------------------------------------------------------------|-------------------------|
| <b>3a</b> | $S_0 \rightarrow S_1$ | 3.26                   | 381             | <b>HOMO <math>\rightarrow</math> LUMO (0.670)</b><br>HOMO $\rightarrow$ LUMO+1 (-0.168) | 0.2401                  |
| <b>3b</b> | $S_0 \rightarrow S_1$ | 3.22                   | 385             | <b>HOMO <math>\rightarrow</math> LUMO (0.674)</b><br>HOMO-1 $\rightarrow$ LUMO (-0.153) | 0.1675                  |
| <b>3c</b> | $S_0 \rightarrow S_1$ | 3.16                   | 392             | <b>HOMO <math>\rightarrow</math> LUMO (0.677)</b><br>HOMO-1 $\rightarrow$ LUMO (-0.137) | 0.1361                  |

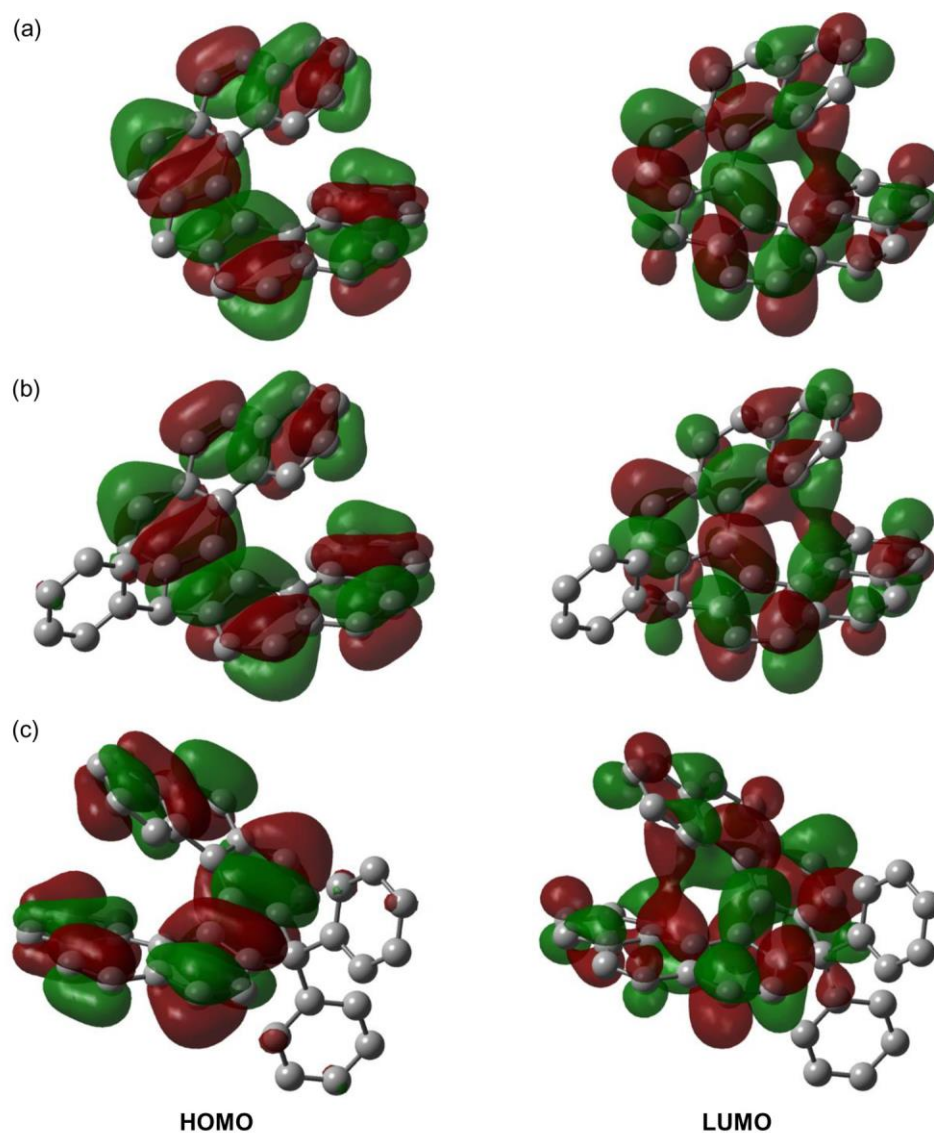**Figure S16.** The HOMOs and LUMOs of (a) **3a**, (b) **3b**, and (c) **3c** calculated by DFT method [B3LYP/6-31G(d)].

## References

1. Frisch, M. J.; Trucks, G. W.; Schlegel, H. B.; Scuseria, G. E.; Robb, M. A.; Cheeseman, J. R.; Scalmani, G.; Barone, V.; Mennucci, B.; Petersson, G. A.; Nakatsuji, H.; Caricato, M.; Li, X.; Hratchian, H. P.; Izmaylov, A. F.; Bloino, J.; Zheng, G.; Sonnenberg, J. L.; Hada, M.; Ehara, M.; Toyota, K.; Fukuda, R.; Hasegawa, J.; Ishida, M.; Nakajima, T.; Honda, Y.; Kitao, O.; Nakai, H.; Vreven, T.; Montgomery, J. A., Jr.; Peralta, J. E.; Ogliaro, F.; Bearpark, M.; Heyd, J. J.; Brothers, E.; Kudin, K. N.; Staroverov, V. N.; Kobayashi, R.; Normand, J.; Raghavachari, K.; Rendell, A.; Burant, J. C.; Iyengar, S. S.; Tomasi, J.; Cossi, M.; Rega, N.; Millam, J. M.; Klene, M.; Knox, J. E.; Cross, J. B.; Bakken, V.; Adamo, C.; Jaramillo, J.; Gomperts, R.; Stratmann, R. E.; Yazyev, O.; Austin, A. J.; Cammi, R.; Pomelli, C.; Ochterski, J. W.; Martin, R. L.; Morokuma, K.; Zakrzewski, V. G.; Voth, G. A.; Salvador, P.; Dannenberg, J. J.; Dapprich, S.; Daniels, A. D.; Farkas, Ö.; Foresman, J. B.; Ortiz, J. V.; Cioslowski, J.; Fox, D. J. *Gaussian 09*, Revision D.01; Gaussian, Inc.: Wallingford CT, 2009.
2. Altomare, A.; Burla, M. C.; Camalli, M.; Cascarano, G. L.; Giacovazzo, C.; Guagliardi, A.; Moliterni, A. G. G.; Polidori, G.; Spagna, R. *J. Appl. Crystallogr.* **1999**, **32**, 115.
3. Sheldrick, G. M. *SHELXL-97, Program for the Refinement of Crystal Structures*, University of Göttingen: Göttingen, Germany, 1997.
